# Supplementary material
Source: MDPI journal article supplement (https://www.mdpi.com/2227-7390/10/16/2901)
Supplement: s1 [file s1]

## Supplementary Materials

# Inferences and Engineering Applications of Alpha Power Weibull Distribution Using Progressive Type-II Censoring

Refah Alotaibi<sup>1</sup>, Mazen Nassar<sup>2,3</sup>, Hoda Rezk<sup>4</sup> and Ahmed Elshahhat<sup>5\*</sup>

<sup>1</sup> Department of Mathematical Sciences , College of Science, Princess Nourah bint Abdulrahman University,  
P.O. Box 84428, Riyadh 11671, Saudi Arabia

<sup>2</sup> Department of Statistics, Faculty of Science, King Abdulaziz University, Jeddah 21589, Saudi Arabia

<sup>3</sup> Department of Statistics, Faculty of Commerce, Zagazig University, Zagazig 44519, Egypt

<sup>4</sup> Department of Statistics, Al-Azhar University, Cairo 11751, Egypt

<sup>5</sup> Faculty of Technology and Development, Zagazig University, Zagazig 44519, Egypt

---

\*Email: aelshahhat@ftd.zu.edu.eg

Table S1: The average estimates (first-line), RMSEs (second-line) and MRABs (third-line) of  $\alpha$ .

| $n$<br>Prior $\rightarrow$<br>$q \rightarrow$ | $m$ | Scheme | MLE    | SEL    |        | LL     |        |        |        |        |        |
|-----------------------------------------------|-----|--------|--------|--------|--------|--------|--------|--------|--------|--------|--------|
|                                               |     |        |        | 1      | 2      | 1      |        |        | 2      |        |        |
|                                               |     |        |        |        |        | -2     | -0.02  | +2     | -2     | -0.02  | +2     |
| 50                                            | 20  | 1      | 0.4219 | 0.4605 | 0.4859 | 0.4627 | 0.4605 | 0.4572 | 0.4879 | 0.4860 | 0.4829 |
|                                               |     |        | 1.2179 | 0.0660 | 0.0525 | 0.0379 | 0.0408 | 0.0454 | 0.0093 | 0.0134 | 0.0205 |
|                                               |     |        | 1.2268 | 0.0799 | 0.0238 | 0.0745 | 0.0790 | 0.0856 | 0.0113 | 0.0156 | 0.0226 |
|                                               |     | 2      | 0.6370 | 0.6042 | 0.4927 | 0.6122 | 0.6043 | 0.5944 | 0.4949 | 0.4927 | 0.4892 |
|                                               |     |        | 1.2755 | 0.0914 | 0.0543 | 0.0653 | 0.0675 | 0.0696 | 0.0104 | 0.0146 | 0.0215 |
|                                               |     |        | 1.2443 | 0.1555 | 0.0261 | 0.1207 | 0.1299 | 0.1361 | 0.0147 | 0.0190 | 0.0263 |
|                                               |     | 3      | 0.8900 | 0.5649 | 0.4973 | 0.5680 | 0.5650 | 0.5602 | 0.4996 | 0.4973 | 0.4935 |
|                                               |     |        | 1.4535 | 0.1435 | 0.0555 | 0.1016 | 0.1088 | 0.1155 | 0.0141 | 0.0175 | 0.0232 |
|                                               |     |        | 1.5594 | 0.2374 | 0.0304 | 0.1887 | 0.2086 | 0.2245 | 0.0242 | 0.0281 | 0.0343 |
|                                               | 40  | 1      | 0.4281 | 0.5368 | 0.5047 | 0.5402 | 0.5368 | 0.5320 | 0.5069 | 0.5047 | 0.5010 |
|                                               |     |        | 0.8184 | 0.0758 | 0.0518 | 0.0408 | 0.0419 | 0.0436 | 0.0092 | 0.0133 | 0.0195 |
|                                               |     |        | 0.9637 | 0.1050 | 0.0190 | 0.0743 | 0.0752 | 0.0804 | 0.0100 | 0.0140 | 0.0207 |
|                                               |     | 2      | 0.5877 | 0.5424 | 0.4806 | 0.5464 | 0.5425 | 0.5372 | 0.4824 | 0.4806 | 0.4778 |
|                                               |     |        | 1.2324 | 0.0822 | 0.0527 | 0.0456 | 0.0475 | 0.0500 | 0.0118 | 0.0141 | 0.0198 |
|                                               |     |        | 1.2322 | 0.1129 | 0.0370 | 0.0829 | 0.0859 | 0.0928 | 0.0223 | 0.0259 | 0.0325 |
|                                               |     | 3      | 0.7929 | 0.3497 | 0.4930 | 0.3560 | 0.3498 | 0.3435 | 0.4951 | 0.4930 | 0.4897 |
|                                               |     |        | 1.3099 | 0.1701 | 0.0553 | 0.1444 | 0.1505 | 0.1568 | 0.0190 | 0.0218 | 0.0265 |
|                                               |     |        | 1.3156 | 0.3014 | 0.0390 | 0.2880 | 0.3005 | 0.3131 | 0.0352 | 0.0388 | 0.0443 |
| 100                                           | 40  | 1      | 0.4129 | 0.4618 | 0.4930 | 0.4659 | 0.4618 | 0.4572 | 0.4986 | 0.4967 | 0.4936 |
|                                               |     |        | 0.7977 | 0.0582 | 0.0494 | 0.0133 | 0.0176 | 0.0245 | 0.0082 | 0.0118 | 0.0173 |
|                                               |     |        | 0.9995 | 0.0494 | 0.0174 | 0.0211 | 0.0261 | 0.0338 | 0.0104 | 0.0140 | 0.0198 |
|                                               |     | 2      | 0.5909 | 0.4869 | 0.4966 | 0.4894 | 0.4869 | 0.4831 | 0.5045 | 0.5026 | 0.4995 |
|                                               |     |        | 1.0605 | 0.0670 | 0.0505 | 0.0344 | 0.0386 | 0.0436 | 0.0091 | 0.0122 | 0.0177 |
|                                               |     |        | 1.0999 | 0.0851 | 0.0193 | 0.0681 | 0.0764 | 0.0855 | 0.0116 | 0.0153 | 0.0214 |
|                                               |     | 3      | 0.8328 | 0.4585 | 0.5026 | 0.4608 | 0.4586 | 0.4553 | 0.4948 | 0.4930 | 0.4901 |
|                                               |     |        | 1.1346 | 0.0764 | 0.0510 | 0.0397 | 0.0423 | 0.0462 | 0.0093 | 0.0129 | 0.0185 |
|                                               |     |        | 1.2799 | 0.1230 | 0.0309 | 0.0783 | 0.0829 | 0.0893 | 0.0183 | 0.0216 | 0.0274 |
|                                               | 80  | 1      | 0.4594 | 0.5032 | 0.4919 | 0.5053 | 0.5032 | 0.5006 | 0.4938 | 0.4919 | 0.4888 |
|                                               |     |        | 0.6352 | 0.0514 | 0.0490 | 0.0084 | 0.0094 | 0.0121 | 0.0096 | 0.0134 | 0.0194 |
|                                               |     |        | 0.8219 | 0.0553 | 0.0192 | 0.0160 | 0.0170 | 0.0194 | 0.0123 | 0.0162 | 0.0225 |
|                                               |     | 2      | 0.5875 | 0.4796 | 0.4908 | 0.4822 | 0.4796 | 0.4759 | 0.4929 | 0.4908 | 0.4875 |
|                                               |     |        | 0.8685 | 0.0603 | 0.0527 | 0.0199 | 0.0237 | 0.0297 | 0.0107 | 0.0147 | 0.0212 |
|                                               |     |        | 1.0519 | 0.0594 | 0.0209 | 0.0356 | 0.0408 | 0.0482 | 0.0143 | 0.0184 | 0.0250 |
|                                               |     | 3      | 0.6835 | 0.5417 | 0.4896 | 0.5448 | 0.5418 | 0.5367 | 0.4916 | 0.4897 | 0.4864 |
|                                               |     |        | 0.9645 | 0.0761 | 0.0530 | 0.0428 | 0.0440 | 0.0457 | 0.0117 | 0.0156 | 0.0218 |
|                                               |     |        | 1.1367 | 0.1121 | 0.0220 | 0.0791 | 0.0836 | 0.0895 | 0.0167 | 0.0207 | 0.0272 |

Table S2: The average estimates (first-line), RMSEs (second-line) and MRABs (third-line) of  $\beta$ .

| $n$<br>Prior $\rightarrow$<br>$q \rightarrow$ | $m$ | Scheme | MLE    | SEL    |        | LL     |        |        |        |        |        |
|-----------------------------------------------|-----|--------|--------|--------|--------|--------|--------|--------|--------|--------|--------|
|                                               |     |        |        | 1      | 2      | 1      |        |        | 2      |        |        |
|                                               |     |        |        |        |        | -2     | -0.02  | +2     | -2     | -0.02  | +2     |
| 50                                            | 20  | 1      | 1.4978 | 1.3763 | 1.4797 | 1.3850 | 1.3764 | 1.3540 | 1.4939 | 1.4850 | 1.4578 |
|                                               |     |        | 0.3118 | 0.1381 | 0.1281 | 0.0563 | 0.0566 | 0.0942 | 0.0158 | 0.0341 | 0.0848 |
|                                               |     |        | 0.1643 | 0.0503 | 0.0138 | 0.0338 | 0.0361 | 0.0467 | 0.0066 | 0.0128 | 0.0314 |
|                                               |     | 2      | 1.5084 | 1.5476 | 1.4848 | 1.5551 | 1.5477 | 1.5305 | 1.4914 | 1.4825 | 1.4554 |
|                                               |     |        | 0.3161 | 0.1428 | 0.1296 | 0.0726 | 0.0826 | 0.1125 | 0.0161 | 0.0342 | 0.0887 |
|                                               |     |        | 0.1656 | 0.0532 | 0.0152 | 0.0480 | 0.0531 | 0.0661 | 0.0079 | 0.0138 | 0.0328 |
|                                               |     | 3      | 1.4928 | 1.5250 | 1.4824 | 1.5339 | 1.5252 | 1.5025 | 1.4891 | 1.4799 | 1.4513 |
|                                               |     |        | 0.4107 | 0.2127 | 0.1310 | 0.1547 | 0.1672 | 0.2000 | 0.0188 | 0.0363 | 0.0902 |
|                                               |     |        | 0.2148 | 0.1110 | 0.0183 | 0.1028 | 0.1108 | 0.1287 | 0.0091 | 0.0151 | 0.0340 |
|                                               | 40  | 1      | 1.4888 | 1.4693 | 1.4825 | 1.4797 | 1.4694 | 1.4463 | 1.4915 | 1.4827 | 1.4563 |
|                                               |     |        | 0.2728 | 0.1304 | 0.1261 | 0.0527 | 0.0546 | 0.0850 | 0.0146 | 0.0323 | 0.0731 |
|                                               |     |        | 0.1442 | 0.0482 | 0.0135 | 0.0262 | 0.0312 | 0.0358 | 0.0064 | 0.0124 | 0.0308 |
|                                               |     | 2      | 1.4945 | 1.4531 | 1.4890 | 1.4607 | 1.4532 | 1.4358 | 1.4984 | 1.4891 | 1.4600 |
|                                               |     |        | 0.2834 | 0.1375 | 0.1292 | 0.0375 | 0.0386 | 0.0944 | 0.0146 | 0.0333 | 0.0849 |
|                                               |     |        | 0.1478 | 0.0372 | 0.0133 | 0.0229 | 0.0243 | 0.0369 | 0.0067 | 0.0131 | 0.0319 |
|                                               |     | 3      | 1.4510 | 1.5977 | 1.4936 | 1.6130 | 1.5979 | 1.5458 | 1.5032 | 1.4938 | 1.4644 |
|                                               |     |        | 0.3010 | 0.1713 | 0.1305 | 0.1055 | 0.1083 | 0.1581 | 0.0162 | 0.0341 | 0.0897 |
|                                               |     |        | 0.1556 | 0.0826 | 0.0136 | 0.0663 | 0.0753 | 0.0840 | 0.0073 | 0.0134 | 0.0325 |
| 100                                           | 40  | 1      | 1.4655 | 1.4761 | 1.4773 | 1.4870 | 1.4763 | 1.4447 | 1.4863 | 1.4774 | 1.4502 |
|                                               |     |        | 0.2701 | 0.1276 | 0.1176 | 0.0220 | 0.0356 | 0.0873 | 0.0138 | 0.0310 | 0.0779 |
|                                               |     |        | 0.1404 | 0.0332 | 0.0128 | 0.0135 | 0.0204 | 0.0365 | 0.0057 | 0.0115 | 0.0295 |
|                                               |     | 2      | 1.4678 | 1.4887 | 1.4877 | 1.5010 | 1.4889 | 1.4563 | 1.4969 | 1.4879 | 1.4602 |
|                                               |     |        | 0.2801 | 0.1371 | 0.1286 | 0.0409 | 0.0519 | 0.0882 | 0.0156 | 0.0315 | 0.0813 |
|                                               |     |        | 0.1449 | 0.0385 | 0.0151 | 0.0326 | 0.0368 | 0.0428 | 0.0066 | 0.0127 | 0.0321 |
|                                               |     | 3      | 1.4168 | 1.4676 | 1.4926 | 1.4788 | 1.4677 | 1.4299 | 1.5020 | 1.4928 | 1.4643 |
|                                               |     |        | 0.3283 | 0.1960 | 0.1306 | 0.1157 | 0.1259 | 0.1351 | 0.0167 | 0.0349 | 0.0889 |
|                                               |     |        | 0.1728 | 0.0908 | 0.0173 | 0.0767 | 0.0824 | 0.0974 | 0.0086 | 0.0146 | 0.0332 |
|                                               | 80  | 1      | 1.4656 | 1.3337 | 1.4807 | 1.3458 | 1.3339 | 1.3070 | 1.4901 | 1.4809 | 1.4521 |
|                                               |     |        | 0.2287 | 0.1272 | 0.1175 | 0.0162 | 0.0349 | 0.0837 | 0.0133 | 0.0304 | 0.0584 |
|                                               |     |        | 0.1181 | 0.0238 | 0.0121 | 0.0086 | 0.0158 | 0.0351 | 0.0055 | 0.0114 | 0.0291 |
|                                               |     | 2      | 1.4699 | 1.4202 | 1.4802 | 1.4280 | 1.4203 | 1.4009 | 1.4895 | 1.4804 | 1.4522 |
|                                               |     |        | 0.2319 | 0.1277 | 0.1232 | 0.0192 | 0.0364 | 0.0859 | 0.0139 | 0.0312 | 0.0654 |
|                                               |     |        | 0.1215 | 0.0308 | 0.0129 | 0.0106 | 0.0160 | 0.0370 | 0.0057 | 0.0116 | 0.0297 |
|                                               |     | 3      | 1.4282 | 1.5442 | 1.4807 | 1.5541 | 1.5444 | 1.5167 | 1.4899 | 1.4808 | 1.4529 |
|                                               |     |        | 0.2597 | 0.1477 | 0.1293 | 0.0242 | 0.0442 | 0.1155 | 0.0152 | 0.0326 | 0.0867 |
|                                               |     |        | 0.1315 | 0.0413 | 0.0135 | 0.0141 | 0.0215 | 0.0467 | 0.0070 | 0.0128 | 0.0319 |

Table S3: The average estimates (first-line), RMSEs (second-line) and MRABs (third-line) of  $\theta$ .

| $n$<br>Prior $\rightarrow$<br>$q \rightarrow$ | $m$ | Scheme | MLE    | SEL    |        | LL     |        |        |        |        |        |
|-----------------------------------------------|-----|--------|--------|--------|--------|--------|--------|--------|--------|--------|--------|
|                                               |     |        |        | 1      | 2      | 1      |        |        | 2      |        |        |
|                                               |     |        |        |        |        | -2     | -0.02  | +2     | -2     | -0.02  | +2     |
| 50                                            | 20  | 1      | 0.1561 | 0.1176 | 0.1237 | 0.1033 | 0.1758 | 0.1179 | 0.1086 | 0.1890 | 0.1240 |
|                                               |     |        | 0.1679 | 0.0181 | 0.0174 | 0.0251 | 0.0411 | 0.0543 | 0.0149 | 0.0349 | 0.0489 |
|                                               |     |        | 1.0120 | 0.0408 | 0.0296 | 0.2119 | 0.2235 | 0.3666 | 0.1239 | 0.1881 | 0.2929 |
|                                               |     | 2      | 0.1645 | 0.1152 | 0.1152 | 0.0994 | 0.1837 | 0.1155 | 0.0998 | 0.1831 | 0.1155 |
|                                               |     |        | 0.1751 | 0.0197 | 0.0183 | 0.0303 | 0.0456 | 0.0601 | 0.0200 | 0.0357 | 0.0498 |
|                                               |     |        | 1.0367 | 0.0470 | 0.0361 | 0.2329 | 0.2626 | 0.4324 | 0.1460 | 0.2027 | 0.2980 |
|                                               |     | 3      | 0.2119 | 0.1429 | 0.1105 | 0.1268 | 0.2136 | 0.1432 | 0.0950 | 0.1788 | 0.1108 |
|                                               |     |        | 0.2527 | 0.0208 | 0.0185 | 0.0328 | 0.0550 | 0.0758 | 0.0223 | 0.0365 | 0.0527 |
|                                               |     |        | 1.5828 | 0.0672 | 0.0363 | 0.2684 | 0.5362 | 0.6731 | 0.1783 | 0.2038 | 0.3363 |
|                                               | 40  | 1      | 0.1465 | 0.1278 | 0.1184 | 0.1146 | 0.1781 | 0.1281 | 0.1032 | 0.1842 | 0.1187 |
|                                               |     |        | 0.1440 | 0.0180 | 0.0164 | 0.0190 | 0.0346 | 0.0500 | 0.0149 | 0.0341 | 0.0459 |
|                                               |     |        | 0.8934 | 0.0331 | 0.0272 | 0.1468 | 0.1902 | 0.3039 | 0.1112 | 0.1790 | 0.2567 |
|                                               |     | 2      | 0.1472 | 0.1230 | 0.1364 | 0.1075 | 0.1895 | 0.1233 | 0.1212 | 0.2019 | 0.1367 |
|                                               |     |        | 0.1462 | 0.0183 | 0.0182 | 0.0201 | 0.0384 | 0.0509 | 0.0187 | 0.0342 | 0.0473 |
|                                               |     |        | 0.9002 | 0.0384 | 0.0280 | 0.1789 | 0.2273 | 0.3575 | 0.1196 | 0.1862 | 0.2647 |
|                                               |     | 3      | 0.1706 | 0.1091 | 0.1259 | 0.0901 | 0.2057 | 0.1095 | 0.1101 | 0.1962 | 0.1262 |
|                                               |     |        | 0.1752 | 0.0191 | 0.0182 | 0.0251 | 0.0475 | 0.0643 | 0.0181 | 0.0343 | 0.0497 |
|                                               |     |        | 1.0858 | 0.0433 | 0.0316 | 0.1836 | 0.4622 | 0.5729 | 0.1286 | 0.1924 | 0.2654 |
| 100                                           | 40  | 1      | 0.1629 | 0.1671 | 0.1281 | 0.1536 | 0.2165 | 0.1673 | 0.1129 | 0.1941 | 0.1284 |
|                                               |     |        | 0.1492 | 0.0180 | 0.0172 | 0.0151 | 0.0342 | 0.0450 | 0.0143 | 0.0306 | 0.0437 |
|                                               |     |        | 0.9685 | 0.0364 | 0.0284 | 0.1227 | 0.1823 | 0.2775 | 0.1028 | 0.1623 | 0.2656 |
|                                               |     | 2      | 0.1583 | 0.1177 | 0.1301 | 0.1002 | 0.2009 | 0.1181 | 0.1147 | 0.1975 | 0.1304 |
|                                               |     |        | 0.1649 | 0.0182 | 0.0180 | 0.0195 | 0.0356 | 0.0494 | 0.0166 | 0.0346 | 0.0455 |
|                                               |     |        | 0.9891 | 0.0372 | 0.0315 | 0.1463 | 0.1950 | 0.2838 | 0.1132 | 0.1882 | 0.2808 |
|                                               |     | 3      | 0.2245 | 0.1331 | 0.1333 | 0.1184 | 0.1913 | 0.1333 | 0.1178 | 0.2013 | 0.1336 |
|                                               |     |        | 0.2342 | 0.0189 | 0.0181 | 0.0220 | 0.0377 | 0.0497 | 0.0159 | 0.0362 | 0.0441 |
|                                               |     |        | 1.5037 | 0.0448 | 0.0335 | 0.1843 | 0.2178 | 0.3334 | 0.1448 | 0.1945 | 0.2960 |
|                                               | 80  | 1      | 0.1424 | 0.1571 | 0.1295 | 0.1462 | 0.1918 | 0.1573 | 0.1146 | 0.1931 | 0.1298 |
|                                               |     |        | 0.1288 | 0.0179 | 0.0151 | 0.0136 | 0.0332 | 0.0438 | 0.0140 | 0.0282 | 0.0411 |
|                                               |     |        | 0.8214 | 0.0319 | 0.0257 | 0.0917 | 0.1779 | 0.2401 | 0.0769 | 0.1562 | 0.2336 |
|                                               |     | 2      | 0.1403 | 0.1120 | 0.1145 | 0.0975 | 0.1715 | 0.1123 | 0.0994 | 0.1794 | 0.1148 |
|                                               |     |        | 0.1358 | 0.0178 | 0.0172 | 0.0147 | 0.0339 | 0.0452 | 0.0148 | 0.0306 | 0.0422 |
|                                               |     |        | 0.7969 | 0.0339 | 0.0301 | 0.1203 | 0.1831 | 0.2710 | 0.0859 | 0.1707 | 0.2346 |
|                                               |     | 3      | 0.1649 | 0.1073 | 0.1262 | 0.0906 | 0.1847 | 0.1076 | 0.1111 | 0.1914 | 0.1265 |
|                                               |     |        | 0.1748 | 0.0184 | 0.0174 | 0.0179 | 0.0344 | 0.0487 | 0.0177 | 0.0319 | 0.0450 |
|                                               |     |        | 1.0460 | 0.0428 | 0.0272 | 0.1686 | 0.1828 | 0.3244 | 0.1011 | 0.1827 | 0.2618 |

Table S4: The average estimates (first-line), RMSEs (second-line) and MRABs (third-line) of  $R(t)$ .

| $n$<br>Prior $\rightarrow$<br>$q \rightarrow$ | $m$ | Scheme | MLE    | SEL    |        | LL     |        |        |        |        |        |
|-----------------------------------------------|-----|--------|--------|--------|--------|--------|--------|--------|--------|--------|--------|
|                                               |     |        |        | 1      | 2      | 1      |        |        | 2      |        |        |
|                                               |     |        |        |        |        | -2     | -0.02  | +2     | -2     | -0.02  | +2     |
| 50                                            | 20  | 1      | 0.9515 | 0.9360 | 0.9382 | 0.9428 | 0.9361 | 0.9191 | 0.9449 | 0.9383 | 0.9214 |
|                                               |     |        | 0.0225 | 0.0106 | 0.0105 | 0.0064 | 0.0115 | 0.0156 | 0.0031 | 0.0084 | 0.0107 |
|                                               |     |        | 0.0188 | 0.0038 | 0.0018 | 0.0065 | 0.0081 | 0.0148 | 0.0021 | 0.0074 | 0.0123 |
|                                               |     | 2      | 0.9532 | 0.9484 | 0.9424 | 0.9548 | 0.9485 | 0.9331 | 0.9493 | 0.9425 | 0.9248 |
|                                               |     |        | 0.0204 | 0.0110 | 0.0107 | 0.0035 | 0.0090 | 0.0137 | 0.0026 | 0.0075 | 0.0116 |
|                                               |     |        | 0.0168 | 0.0024 | 0.0021 | 0.0028 | 0.0107 | 0.0178 | 0.0023 | 0.0075 | 0.0163 |
|                                               |     | 3      | 0.9540 | 0.9350 | 0.9446 | 0.9415 | 0.9351 | 0.9195 | 0.9516 | 0.9447 | 0.9266 |
|                                               |     |        | 0.0260 | 0.0113 | 0.0108 | 0.0035 | 0.0094 | 0.0157 | 0.0032 | 0.0087 | 0.0118 |
|                                               |     |        | 0.0218 | 0.0026 | 0.0021 | 0.0029 | 0.0084 | 0.0177 | 0.0023 | 0.0078 | 0.0163 |
|                                               | 40  | 1      | 0.9528 | 0.9377 | 0.9413 | 0.9438 | 0.9378 | 0.9232 | 0.9482 | 0.9414 | 0.9241 |
|                                               |     |        | 0.0203 | 0.0106 | 0.0099 | 0.0064 | 0.0094 | 0.0112 | 0.0030 | 0.0078 | 0.0099 |
|                                               |     |        | 0.0167 | 0.0038 | 0.0017 | 0.0064 | 0.0079 | 0.0137 | 0.0019 | 0.0064 | 0.0103 |
|                                               |     | 2      | 0.9527 | 0.9404 | 0.9326 | 0.9468 | 0.9405 | 0.9252 | 0.9391 | 0.9327 | 0.9164 |
|                                               |     |        | 0.0201 | 0.0105 | 0.0101 | 0.0030 | 0.0080 | 0.0106 | 0.0025 | 0.0071 | 0.0105 |
|                                               |     |        | 0.0166 | 0.0022 | 0.0019 | 0.0020 | 0.0067 | 0.0149 | 0.0016 | 0.0048 | 0.0119 |
|                                               |     | 3      | 0.9524 | 0.9436 | 0.9381 | 0.9511 | 0.9437 | 0.9237 | 0.9449 | 0.9382 | 0.9207 |
|                                               |     |        | 0.0211 | 0.0109 | 0.0107 | 0.0029 | 0.0078 | 0.0132 | 0.0025 | 0.0072 | 0.0112 |
|                                               |     |        | 0.0177 | 0.0023 | 0.0016 | 0.0026 | 0.0081 | 0.0190 | 0.0021 | 0.0074 | 0.0155 |
| 100                                           | 40  | 1      | 0.9530 | 0.9161 | 0.9367 | 0.9220 | 0.9161 | 0.9026 | 0.9433 | 0.9368 | 0.9203 |
|                                               |     |        | 0.0160 | 0.0105 | 0.0102 | 0.0030 | 0.0082 | 0.0112 | 0.0028 | 0.0073 | 0.0102 |
|                                               |     |        | 0.0133 | 0.0020 | 0.0017 | 0.0020 | 0.0071 | 0.0126 | 0.0018 | 0.0049 | 0.0085 |
|                                               |     | 2      | 0.9524 | 0.9416 | 0.9365 | 0.9489 | 0.9417 | 0.9228 | 0.9431 | 0.9366 | 0.9201 |
|                                               |     |        | 0.0156 | 0.0105 | 0.0104 | 0.0026 | 0.0063 | 0.0100 | 0.0026 | 0.0056 | 0.0087 |
|                                               |     |        | 0.0131 | 0.0019 | 0.0018 | 0.0019 | 0.0064 | 0.0141 | 0.0018 | 0.0066 | 0.0103 |
|                                               |     | 3      | 0.9533 | 0.9316 | 0.9348 | 0.9384 | 0.9317 | 0.9146 | 0.9414 | 0.9349 | 0.9186 |
|                                               |     |        | 0.0190 | 0.0107 | 0.0106 | 0.0033 | 0.0087 | 0.0106 | 0.0030 | 0.0080 | 0.0104 |
|                                               |     |        | 0.0158 | 0.0026 | 0.0019 | 0.0023 | 0.0082 | 0.0138 | 0.0018 | 0.0060 | 0.0109 |
|                                               | 80  | 1      | 0.9524 | 0.9163 | 0.9357 | 0.9217 | 0.9163 | 0.9045 | 0.9424 | 0.9358 | 0.9193 |
|                                               |     |        | 0.0148 | 0.0105 | 0.0097 | 0.0026 | 0.0063 | 0.0100 | 0.0028 | 0.0060 | 0.0100 |
|                                               |     |        | 0.0123 | 0.0018 | 0.0015 | 0.0017 | 0.0055 | 0.0104 | 0.0016 | 0.0054 | 0.0077 |
|                                               |     | 2      | 0.9526 | 0.9413 | 0.9425 | 0.9479 | 0.9414 | 0.9251 | 0.9493 | 0.9426 | 0.9253 |
|                                               |     |        | 0.0144 | 0.0106 | 0.0101 | 0.0025 | 0.0058 | 0.0094 | 0.0025 | 0.0031 | 0.0052 |
|                                               |     |        | 0.0120 | 0.0019 | 0.0017 | 0.0018 | 0.0060 | 0.0111 | 0.0015 | 0.0038 | 0.0089 |
|                                               |     | 3      | 0.9514 | 0.9495 | 0.9371 | 0.9566 | 0.9496 | 0.9310 | 0.9439 | 0.9372 | 0.9202 |
|                                               |     |        | 0.0156 | 0.0105 | 0.0103 | 0.0027 | 0.0057 | 0.0092 | 0.0026 | 0.0049 | 0.0086 |
|                                               |     |        | 0.0128 | 0.0021 | 0.0016 | 0.0021 | 0.0065 | 0.0098 | 0.0016 | 0.0050 | 0.0070 |

Table S5: The average estimates (first-line), RMSEs (second-line) and MRABs (third-line) of  $h(t)$ .

| $n$<br>Prior $\rightarrow$<br>$q \rightarrow$ | $m$ | Scheme | MLE    | SEL    |        | LL     |        |        |        |        |        |
|-----------------------------------------------|-----|--------|--------|--------|--------|--------|--------|--------|--------|--------|--------|
|                                               |     |        |        | 1      | 2      | 1      |        |        | 2      |        |        |
|                                               |     |        |        |        |        | -2     | -0.02  | +2     | -2     | -0.02  | +2     |
| 50                                            | 20  | 1      | 0.1410 | 0.1658 | 0.1698 | 0.1506 | 0.2292 | 0.1661 | 0.1552 | 0.2313 | 0.1701 |
|                                               |     |        | 0.0498 | 0.0199 | 0.0192 | 0.0293 | 0.0393 | 0.0474 | 0.0193 | 0.0327 | 0.0436 |
|                                               |     |        | 0.2763 | 0.0507 | 0.0227 | 0.1728 | 0.1573 | 0.2318 | 0.1212 | 0.1469 | 0.2048 |
|                                               |     | 2      | 0.1399 | 0.1550 | 0.1584 | 0.1301 | 0.3150 | 0.1556 | 0.1417 | 0.2362 | 0.1587 |
|                                               |     |        | 0.0486 | 0.0252 | 0.0191 | 0.0315 | 0.0390 | 0.0394 | 0.0163 | 0.0285 | 0.0343 |
|                                               |     |        | 0.2636 | 0.0423 | 0.0250 | 0.1706 | 0.1813 | 0.1974 | 0.0994 | 0.1484 | 0.1821 |
|                                               |     | 3      | 0.1352 | 0.1908 | 0.1514 | 0.1706 | 0.2957 | 0.1912 | 0.1343 | 0.2328 | 0.1517 |
|                                               |     |        | 0.0614 | 0.0223 | 0.0194 | 0.0298 | 0.0389 | 0.0502 | 0.0221 | 0.0326 | 0.0467 |
|                                               |     |        | 0.3434 | 0.0632 | 0.0302 | 0.1728 | 0.2065 | 0.2351 | 0.1258 | 0.1576 | 0.2244 |
|                                               | 40  | 1      | 0.1387 | 0.1754 | 0.1619 | 0.1577 | 0.2599 | 0.1757 | 0.1452 | 0.2404 | 0.1623 |
|                                               |     |        | 0.0464 | 0.0177 | 0.0176 | 0.0217 | 0.0342 | 0.0474 | 0.0198 | 0.0323 | 0.0416 |
|                                               |     |        | 0.2553 | 0.0472 | 0.0221 | 0.1251 | 0.1494 | 0.2079 | 0.0999 | 0.1286 | 0.1985 |
|                                               |     | 2      | 0.1394 | 0.1676 | 0.1883 | 0.1470 | 0.2813 | 0.1681 | 0.1742 | 0.2461 | 0.1886 |
|                                               |     |        | 0.0459 | 0.0222 | 0.0175 | 0.0219 | 0.0330 | 0.0372 | 0.0155 | 0.0249 | 0.0269 |
|                                               |     |        | 0.2512 | 0.0309 | 0.0295 | 0.1429 | 0.1756 | 0.1931 | 0.0956 | 0.1384 | 0.1654 |
|                                               |     | 3      | 0.1376 | 0.1562 | 0.1718 | 0.1445 | 0.1956 | 0.1564 | 0.1564 | 0.2392 | 0.1721 |
|                                               |     |        | 0.0487 | 0.0220 | 0.0182 | 0.0256 | 0.0354 | 0.0404 | 0.0197 | 0.0290 | 0.0366 |
|                                               |     |        | 0.2703 | 0.0357 | 0.0255 | 0.1356 | 0.1517 | 0.1830 | 0.0916 | 0.1279 | 0.1642 |
| 100                                           | 40  | 1      | 0.1383 | 0.2372 | 0.1750 | 0.2254 | 0.2712 | 0.2374 | 0.1600 | 0.2390 | 0.1753 |
|                                               |     |        | 0.0361 | 0.0179 | 0.0148 | 0.0184 | 0.0326 | 0.0496 | 0.0171 | 0.0226 | 0.0358 |
|                                               |     |        | 0.1982 | 0.0270 | 0.0203 | 0.0843 | 0.1180 | 0.1722 | 0.0833 | 0.1178 | 0.1550 |
|                                               |     | 2      | 0.1410 | 0.1593 | 0.1769 | 0.1427 | 0.2327 | 0.1596 | 0.1618 | 0.2421 | 0.1772 |
|                                               |     |        | 0.0356 | 0.0188 | 0.0181 | 0.0213 | 0.0243 | 0.0313 | 0.0153 | 0.0160 | 0.0258 |
|                                               |     |        | 0.1949 | 0.0294 | 0.0217 | 0.1122 | 0.1505 | 0.1681 | 0.0927 | 0.1329 | 0.1594 |
|                                               |     | 3      | 0.1374 | 0.1832 | 0.1823 | 0.1728 | 0.2121 | 0.1833 | 0.1675 | 0.2441 | 0.1826 |
|                                               |     |        | 0.0447 | 0.0182 | 0.0168 | 0.0194 | 0.0340 | 0.0363 | 0.0173 | 0.0224 | 0.0439 |
|                                               |     |        | 0.2473 | 0.0347 | 0.0207 | 0.0890 | 0.1304 | 0.1601 | 0.0751 | 0.1158 | 0.1694 |
|                                               | 80  | 1      | 0.1402 | 0.2140 | 0.1774 | 0.2054 | 0.2365 | 0.2142 | 0.1631 | 0.2366 | 0.1777 |
|                                               |     |        | 0.0327 | 0.0174 | 0.0137 | 0.0149 | 0.0324 | 0.0321 | 0.0139 | 0.0207 | 0.0301 |
|                                               |     |        | 0.1806 | 0.0247 | 0.0178 | 0.0558 | 0.1120 | 0.1461 | 0.0669 | 0.0877 | 0.1252 |
|                                               |     | 2      | 0.1404 | 0.1587 | 0.1568 | 0.1402 | 0.2518 | 0.1591 | 0.1414 | 0.2242 | 0.1571 |
|                                               |     |        | 0.0326 | 0.0205 | 0.0181 | 0.0155 | 0.0168 | 0.0286 | 0.0138 | 0.0150 | 0.0236 |
|                                               |     |        | 0.1797 | 0.0290 | 0.0242 | 0.0976 | 0.1399 | 0.1593 | 0.0710 | 0.1317 | 0.1520 |
|                                               |     | 3      | 0.1412 | 0.1441 | 0.1737 | 0.1233 | 0.2607 | 0.1446 | 0.1584 | 0.2403 | 0.1740 |
|                                               |     |        | 0.0352 | 0.0178 | 0.0137 | 0.0182 | 0.0252 | 0.0360 | 0.0153 | 0.0222 | 0.0325 |
|                                               |     |        | 0.1903 | 0.0263 | 0.0194 | 0.0859 | 0.1288 | 0.1581 | 0.0740 | 0.1015 | 0.1317 |

Table S6: The ACLs and CPs of 95% ACI/HPD credible intervals of  $\alpha$ .

| $n$<br>Prior $\rightarrow$ | $m$ | Scheme | ACI    |       | HPD    |       |        |       |
|----------------------------|-----|--------|--------|-------|--------|-------|--------|-------|
|                            |     |        |        |       | 1      |       | 2      |       |
|                            |     |        | ACL    | CP    | ACL    | CP    | ACL    | CP    |
| 50                         | 20  | 1      | 0.6874 | 0.874 | 0.2159 | 0.922 | 0.0847 | 0.947 |
|                            |     | 2      | 0.8174 | 0.834 | 0.2480 | 0.915 | 0.0888 | 0.943 |
|                            |     | 3      | 1.2046 | 0.832 | 0.3097 | 0.911 | 0.0910 | 0.940 |
|                            | 40  | 1      | 0.5450 | 0.934 | 0.1634 | 0.930 | 0.0803 | 0.950 |
|                            |     | 2      | 0.7954 | 0.838 | 0.1886 | 0.926 | 0.0805 | 0.948 |
|                            |     | 3      | 1.0612 | 0.835 | 0.1989 | 0.923 | 0.0831 | 0.946 |
| 100                        | 40  | 1      | 0.5201 | 0.980 | 0.1468 | 0.948 | 0.0722 | 0.965 |
|                            |     | 2      | 0.7087 | 0.854 | 0.1487 | 0.945 | 0.0785 | 0.955 |
|                            |     | 3      | 1.0065 | 0.837 | 0.1495 | 0.944 | 0.0791 | 0.946 |
|                            | 80  | 1      | 0.4410 | 0.996 | 0.1327 | 0.953 | 0.0718 | 0.974 |
|                            |     | 2      | 0.6181 | 0.888 | 0.1338 | 0.950 | 0.0754 | 0.971 |
|                            |     | 3      | 0.8743 | 0.860 | 0.1394 | 0.951 | 0.0757 | 0.962 |

Table S7: The ACLs and CPs of 95% ACI/HPD credible intervals of  $\beta$ .

| $n$<br>Prior $\rightarrow$ | $m$ | Scheme | ACI    |       | HPD    |       |        |       |
|----------------------------|-----|--------|--------|-------|--------|-------|--------|-------|
|                            |     |        |        |       | 1      |       | 2      |       |
|                            |     |        | ACL    | CP    | ACL    | CP    | ACL    | CP    |
| 50                         | 20  | 1      | 1.3872 | 0.923 | 0.3174 | 0.941 | 0.1811 | 0.968 |
|                            |     | 2      | 1.3895 | 0.918 | 0.3624 | 0.935 | 0.1814 | 0.963 |
|                            |     | 3      | 1.8807 | 0.917 | 0.3648 | 0.933 | 0.1939 | 0.961 |
|                            | 40  | 1      | 1.1610 | 0.937 | 0.2479 | 0.954 | 0.1768 | 0.980 |
|                            |     | 2      | 1.1724 | 0.929 | 0.2551 | 0.947 | 0.1787 | 0.978 |
|                            |     | 3      | 1.3275 | 0.927 | 0.3284 | 0.940 | 0.1815 | 0.971 |
| 100                        | 40  | 1      | 1.0222 | 0.949 | 0.2310 | 0.965 | 0.1758 | 0.989 |
|                            |     | 2      | 1.0911 | 0.944 | 0.2503 | 0.963 | 0.1763 | 0.988 |
|                            |     | 3      | 1.4514 | 0.942 | 0.2792 | 0.960 | 0.1776 | 0.985 |
|                            | 80  | 1      | 0.8878 | 0.957 | 0.2242 | 0.972 | 0.1719 | 0.999 |
|                            |     | 2      | 0.9214 | 0.949 | 0.2275 | 0.973 | 0.1734 | 0.999 |
|                            |     | 3      | 0.9834 | 0.948 | 0.2449 | 0.969 | 0.1749 | 0.997 |

Table S8: The ACLs and CPs of 95% ACI/HPD credible intervals of  $\theta$ .

| $n$<br>Prior $\rightarrow$ | $m$ | Scheme | ACI    |       | HPD    |       |        |       |
|----------------------------|-----|--------|--------|-------|--------|-------|--------|-------|
|                            |     |        |        |       | 1      |       | 2      |       |
|                            |     |        | ACL    | CP    | ACL    | CP    | ACL    | CP    |
| 50                         | 20  | 1      | 0.6261 | 0.955 | 0.2821 | 0.989 | 0.2438 | 0.991 |
|                            |     | 2      | 0.6505 | 0.890 | 0.2935 | 0.965 | 0.2534 | 0.973 |
|                            |     | 3      | 1.3002 | 0.878 | 0.3233 | 0.945 | 0.2546 | 0.960 |
|                            | 40  | 1      | 0.5238 | 0.964 | 0.2557 | 0.991 | 0.2412 | 0.997 |
|                            |     | 2      | 0.5253 | 0.902 | 0.2862 | 0.968 | 0.2460 | 0.984 |
|                            |     | 3      | 0.7277 | 0.889 | 0.3012 | 0.954 | 0.2503 | 0.976 |
| 100                        | 40  | 1      | 0.5218 | 0.975 | 0.2698 | 0.992 | 0.2412 | 0.999 |
|                            |     | 2      | 0.5458 | 0.905 | 0.2904 | 0.966 | 0.2457 | 0.985 |
|                            |     | 3      | 1.1498 | 0.893 | 0.3123 | 0.950 | 0.2526 | 0.978 |
|                            | 80  | 1      | 0.4192 | 0.989 | 0.2466 | 0.995 | 0.2394 | 0.999 |
|                            |     | 2      | 0.4397 | 0.936 | 0.2607 | 0.975 | 0.2419 | 0.990 |
|                            |     | 3      | 0.5744 | 0.916 | 0.2875 | 0.972 | 0.2441 | 0.983 |

Table S9: The ACLs and CPs of 95% ACI/HPD credible intervals of  $R(t)$ .

| $n$<br>Prior $\rightarrow$ | $m$ | Scheme | ACI    |       | HPD    |       |        |       |
|----------------------------|-----|--------|--------|-------|--------|-------|--------|-------|
|                            |     |        |        |       | 1      |       | 2      |       |
|                            |     |        | ACL    | CP    | ACL    | CP    | ACL    | CP    |
| 50                         | 20  | 1      | 0.1668 | 0.886 | 0.1400 | 0.940 | 0.0889 | 0.968 |
|                            |     | 2      | 0.1713 | 0.909 | 0.1480 | 0.939 | 0.0831 | 0.970 |
|                            |     | 3      | 0.1705 | 0.886 | 0.1486 | 0.935 | 0.1037 | 0.963 |
|                            | 40  | 1      | 0.1604 | 0.906 | 0.1419 | 0.946 | 0.0824 | 0.974 |
|                            |     | 2      | 0.1543 | 0.896 | 0.1422 | 0.945 | 0.0793 | 0.973 |
|                            |     | 3      | 0.1690 | 0.906 | 0.1433 | 0.942 | 0.0836 | 0.970 |
| 100                        | 40  | 1      | 0.1572 | 0.908 | 0.1400 | 0.942 | 0.0651 | 0.973 |
|                            |     | 2      | 0.1527 | 0.922 | 0.1410 | 0.941 | 0.0609 | 0.971 |
|                            |     | 3      | 0.1602 | 0.908 | 0.1426 | 0.940 | 0.0783 | 0.968 |
|                            | 80  | 1      | 0.1473 | 0.926 | 0.1402 | 0.944 | 0.0610 | 0.977 |
|                            |     | 2      | 0.1525 | 0.925 | 0.1392 | 0.949 | 0.0587 | 0.980 |
|                            |     | 3      | 0.1596 | 0.930 | 0.1418 | 0.945 | 0.0625 | 0.972 |



Table S10: The ACLs and CPs of 95% ACI/HPD credible intervals of  $h(t)$ .

| $n$<br>Prior $\rightarrow$ | $m$ | Scheme | ACI    |       | HPD    |       |        |       |
|----------------------------|-----|--------|--------|-------|--------|-------|--------|-------|
|                            |     |        |        |       | 1      |       | 2      |       |
|                            |     |        | ACL    | CP    | ACL    | CP    | ACL    | CP    |
| 50                         | 20  | 1      | 0.3653 | 0.903 | 0.2766 | 0.928 | 0.1941 | 0.960 |
|                            |     | 2      | 0.2971 | 0.919 | 0.2457 | 0.936 | 0.1915 | 0.962 |
|                            |     | 3      | 0.4025 | 0.898 | 0.2787 | 0.925 | 0.2439 | 0.954 |
|                            | 40  | 1      | 0.3189 | 0.914 | 0.2505 | 0.938 | 0.1783 | 0.965 |
|                            |     | 2      | 0.2601 | 0.910 | 0.2428 | 0.939 | 0.1764 | 0.969 |
|                            |     | 3      | 0.3503 | 0.903 | 0.2617 | 0.932 | 0.1883 | 0.958 |
| 100                        | 40  | 1      | 0.3134 | 0.914 | 0.2493 | 0.944 | 0.1407 | 0.970 |
|                            |     | 2      | 0.2695 | 0.936 | 0.2389 | 0.945 | 0.1362 | 0.973 |
|                            |     | 3      | 0.3443 | 0.910 | 0.2515 | 0.940 | 0.1798 | 0.966 |
|                            | 80  | 1      | 0.3002 | 0.929 | 0.2458 | 0.948 | 0.1295 | 0.976 |
|                            |     | 2      | 0.2402 | 0.930 | 0.2379 | 0.951 | 0.1270 | 0.980 |
|                            |     | 3      | 0.3242 | 0.927 | 0.2512 | 0.947 | 0.1381 | 0.975 |
